# Supplementary material for: Identification of HNF-4α as a key transcription factor to promote ChREBP expression in response to glucose
Source: PubMed Central journal article supplement (PMC4814918; doi:10.1038/srep23944), 2016-03-31
Supplement: srep23944-s1.pdf [file srep23944-s1.pdf]

## **Identification of HNF-4 $\alpha$ as a key transcription factor to promote ChREBP expression in response to glucose**

Jian Meng<sup>1,#</sup>, Ming Feng<sup>1,#</sup>, Weibing Dong<sup>2</sup>, Yemin Zhu<sup>1</sup>, Yakui Li<sup>1</sup>, Ping Zhang<sup>1</sup>, Lifang Wu<sup>1</sup>, Minle Li<sup>1</sup>, Ying Lu<sup>1</sup>, Hanbei Chen<sup>3</sup>, Xing Liu<sup>4</sup>, Yan Lu<sup>4</sup>, Haipeng Sun<sup>2</sup>, Xuemei Tong<sup>1,\*</sup>

<sup>1</sup>Department of Biochemistry and Molecular Cell Biology, Shanghai Key Laboratory for Tumor Microenvironment and Inflammation, Shanghai Jiao Tong University School of Medicine, 280 S. Chongqing Road, Shanghai, 200025, China.

<sup>2</sup>Department of Pathophysiology, Key Laboratory of Cell Differentiation and Apoptosis of Chinese Ministry of Education, Shanghai Jiao Tong University School of Medicine, 280 S. Chongqing Road, Shanghai, 200025, China.

<sup>3</sup>Department of Endocrinology, Xinhua Hospital, Shanghai Jiao Tong University School of Medicine, 1665, Kong Jiang Road, Shanghai, 200092, China.

<sup>4</sup>Department of Endocrinology and Metabolism, Ruijin Hospital, Shanghai Jiao Tong University School of Medicine, 197, Rui-Jin 2nd Road, Shanghai, 200025, China.

<sup>#</sup>These authors contributed equally to this work.

<sup>\*</sup>Correspondence and requests for materials should be addressed to Xuemei Tong

(email: xuemeitong@shsmu.edu.cn)

## **Supplementary Figure legends**

### **Supplementary Figure 1. HNF-4 $\alpha$ promotes ChREBP- $\alpha$ and ChREBP- $\beta$ transcription in 293T cells.**

(a). Real-time PCR analysis for mRNA levels of ChREBP- $\alpha$ , ChREBP- $\beta$  and total ChREBP at 48 hours after expression plasmids containing control (GFP) or HA- HNF-4 $\alpha$  are transfected. \* indicates  $p < 0.05$  when compared with the GFP-transfected sample.

(b). Western blot analysis for endogenous ChREBP protein expression at 48 hours after HA-GFP or HA-HNF-4 $\alpha$  expression plasmids are transfected. Tubulin serves as the loading control.

(c). Real-time PCR analysis for mRNA levels of FAS, ACC, L-PK and SCD1 at 48 hours after empty vector or HA-HNF-4 $\alpha$  expression plasmid is transfected. \* indicates  $p < 0.05$  when compared with the corresponding empty vector-transfected sample.

### **Supplementary Figure 2. Glucose increases HNF-4 $\alpha$ and ChREBP expression in HepG2 cells.**

(a). Real-time PCR analysis for mRNA levels of ChREBP- $\alpha$ , ChREBP- $\beta$  and total ChREBP in HepG2 cells treated with 0 (G0) or 25 mM glucose (G25) for 18 hours. \* indicates  $p < 0.05$  when compared with the corresponding 0 mM glucose-treated sample.

(b). Western blot analysis for endogenous HNF-4 $\alpha$  and ChREBP in HepG2 cells after being treated with 0, 2.5, 5.6 and 25 mM glucose for 18 hours. Actin serves as the loading control.

### **Supplementary Table 1. List of primers for real time PCR analysis.**

# Supplementary figure 1

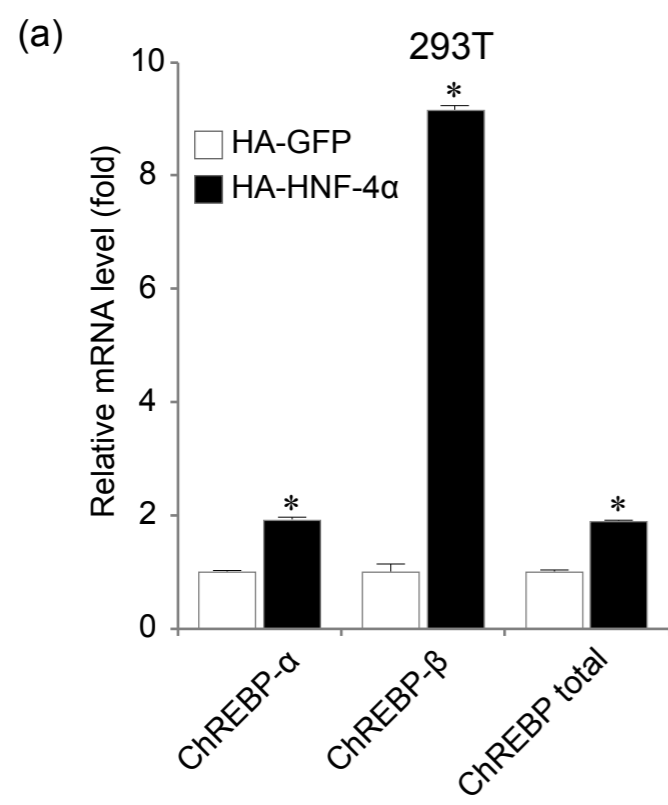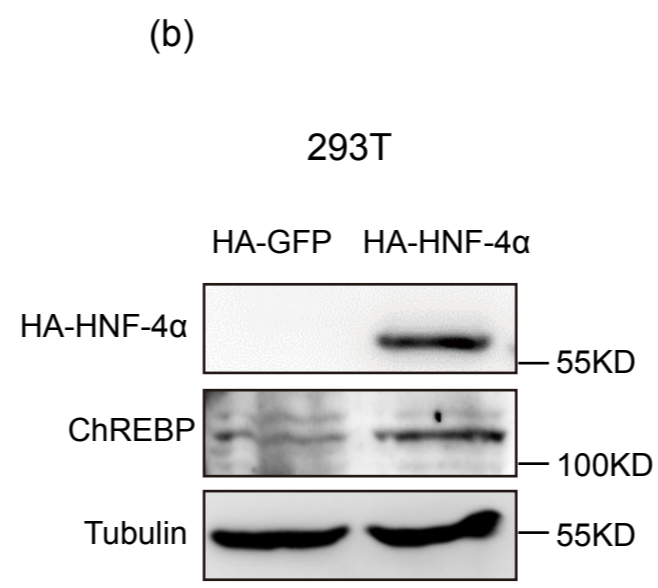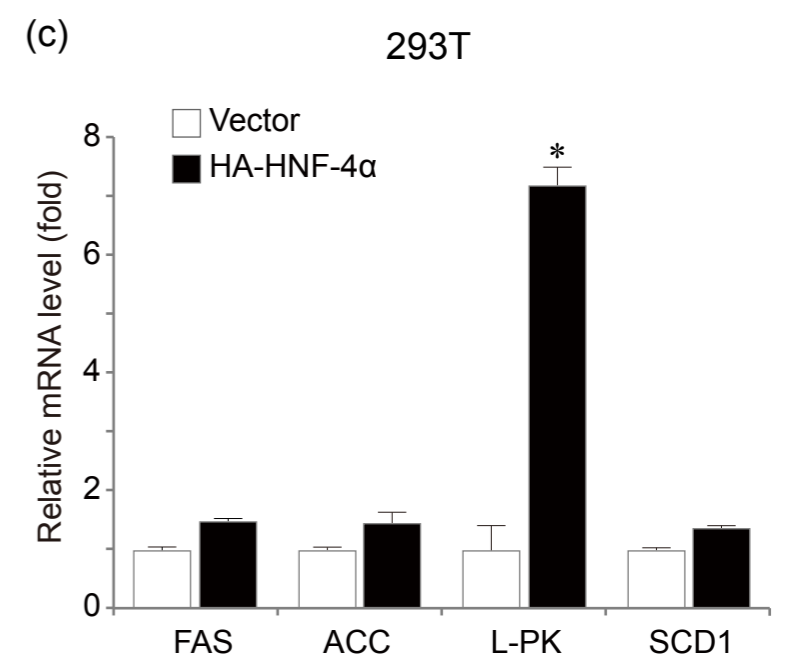

## Supplementary figure 2

(a)

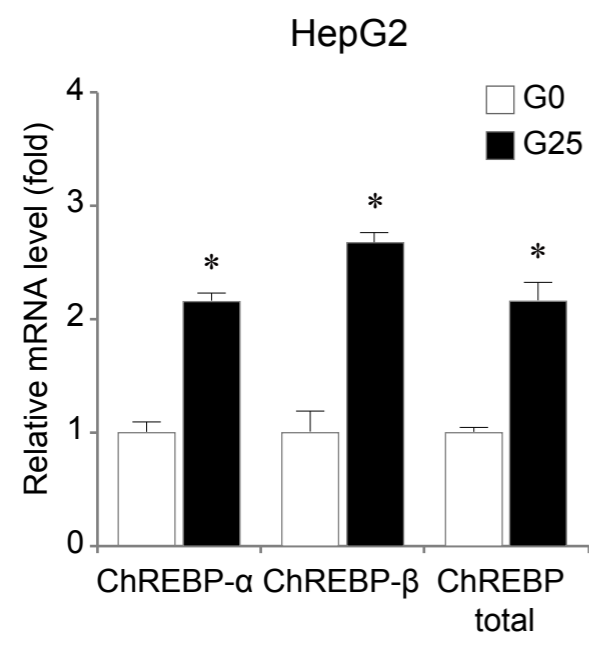

(b)

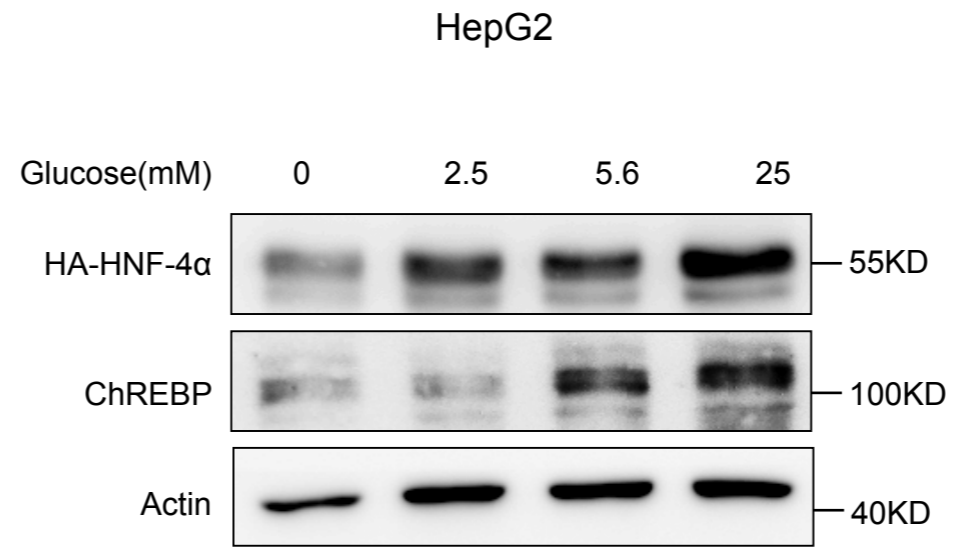

## Supplementary table 1

(a)

| Human            | Forward (5'-3')          | Reverse (5'-3')         |
|------------------|--------------------------|-------------------------|
| $\beta$ -Actin   | GGACTTCGAGCAAGAGATGG     | AGCACTGTGTTGGCGTACAG    |
| ChREBP- $\alpha$ | AGTGCTTGAGCCTGGCCTAC     | TTG TTCAGGCGGTCTTG C    |
| ChREBP- $\beta$  | AGCGGATTCCAGGTGAGG       | TTG TTCAGGCGGATCTTG TC  |
| ChREBP total     | AACTGGAAGTTCTGGGTG TTC   | AGGGAGTTCAGGACATTGG     |
| ACC              | TTGCTGCCTTACTTGGTGAT     | GAGTGGTTTGGCATTGTG TC   |
| LPK              | TCAGCCCAGCTTCTGTCTC      | CACGGAGCTTTCCACTTTC     |
| SCD1             | GTCCTTATGACAAGAACATTAGCC | AATCAATGAAGAATGTGGTGAAG |
| HNF-4 $\alpha$   | ATCAGAAGGCACCAACC        | TTGTCCACCACGCACT        |

(b)

| Mouse            | Forward (5'-3')       | Reverse (5'-3')         |
|------------------|-----------------------|-------------------------|
| 18sRNA           | TTGACTCAACACGGGAAACC  | AGACAAATCGCCCACCAACACC  |
| ChREBP- $\alpha$ | CGACACTCACCCACCTCTTC  | TTG TTCAGCCGGATCTTG TC  |
| ChREBP- $\beta$  | TCTGCAGATCGCGTGGAG    | CTTGTCCCGGCATAGCAAC     |
| ChREBP total     | ATCAGCGCTTTGACCAGATG  | GGGAATTCAGGACAGTTGGC    |
| FAS              | GCTGCGGAAACTTCAGGAAAT | AGAGACGTGTCACTCCTGGACTT |
| LPK              | TTGAGATCCCAGCAGAG AG  | TGCATCTTTACAGCCTCCAC    |
| SCD1             | CCCTGCGGATCTTCCTTATC  | TGTGTTTCTGAGAACTTGTGGTG |
| G6Pase           | CTTGCTGCTCACTTTCCCC   | TCCAAGCGCGAAACCAAAC     |
| PEPCK            | TGTGCACATCCAAACTCGC   | TGAAGGCCTCGTACACCAG     |
| HNF-4 $\alpha$   | GATGCTTCTCGGAGGGTCTG  | TGATGGCTGTGGAGTCTCG     |
